# Supplementary material for: Bile acid hydrazides: gelation, structural, physical and spectroscopic properties
Source: Royal Society of Chemistry journal article supplement (doi:10.1039/c4nj01352b), 2014-10-27
Supplement: c4nj01352b1.pdf [file c4nj01352b1.pdf]

## 1. Electronic Supporting Information

### Bile acid hydrazides: gelation, structural, physical and spectroscopic properties

Vandana S. Pore,<sup>a\*</sup> Sandip G. Agalave,<sup>a</sup> Shrikant G. Pharande<sup>a</sup>, Prashant A. Patil<sup>b</sup>

<sup>a</sup>Organic Chemistry Division, CSIR-National Chemical Laboratory, Dr. Homi Bhabha Road, Pashan, Pune 411 008, India.

<sup>b</sup>Polymer Science and Engineering Division, CSIR-National Chemical Laboratory, Dr. Homi Bhabha Road, Pashan, Pune 411 008, India.

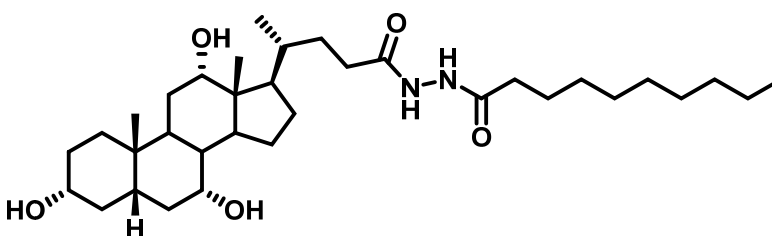

### Contents

| No. | Description                                                                                                                         |
|-----|-------------------------------------------------------------------------------------------------------------------------------------|
| 1   | Experimental                                                                                                                        |
| 2   | General Procedure for synthesis of hydrazides <b>1</b> to <b>6</b>                                                                  |
| 3   | Scheme                                                                                                                              |
| 4   | E-SEM images                                                                                                                        |
| 5   | IR Spectra of (A) Chloroform Solution of <b>1</b> and (B) Chloroform gel of <b>1</b>                                                |
| 6   | DSC study                                                                                                                           |
| 7   | XRD of compound <b>1</b>                                                                                                            |
| 8   | <sup>1</sup> H NMR spectra of compounds <b>1</b> to <b>6</b> and <sup>1</sup> H- <sup>15</sup> N HSQC spectrum of compound <b>1</b> |

## Experimental

**Melting point:** Melting points were determined on a Buchi Melting Point B-540 and are uncorrected.

**FTIR:** for FTIR study, comparison of gelator **1** in powder form and its xerogel was carried on Shimadzu FTIR-8400 spectrophotometer. Xerogel was prepared by allowing gel to dry completely in cool condition (~10°C).

### NMR spectroscopy:

All the liquid state 1D-NMR spectra (<sup>1</sup>H, <sup>13</sup>C NMR) were recorded in CDCl<sub>3</sub> (comp 1), CDCl<sub>3</sub> + CD<sub>3</sub>OD (comp 5 and 6) and CD<sub>3</sub>OD (comp 2,3 and 4) on AC 200 MHz and AV-500 MHz Bruker NMR spectrometers. The temperature dependent <sup>1</sup>H NMR experiments for comp **1** (2 % W/V ) were carried out in CDCl<sub>3</sub> by increasing temperature in 5 steps (25°C, 30°C, 35°C, 40°C and 45°C successively) and for concentration dependent <sup>1</sup>H NMR experiments for comp **1** were carried out in CDCl<sub>3</sub> by using different NMR tubes of concentrations 0.2%, 0.4%, 0.8%, 1.2%, 1.7%, 2.0% and 2.5%. The <sup>1</sup>H chemical shifts were referenced to the trace of CHCl<sub>3</sub> (7.27 ppm) and MeOH (3.3 ppm).

### Gelation studies:

In the gelation experiments, 5mg of the gelator was placed in a glass sample vial and 0.25 ml of solvent was added. The mixture containing 2% (w/v) of the gelator **1** in solvents DCM, CHCl<sub>3</sub> and CCl<sub>4</sub> dissolves at RT, while for solvents Benzene and Toluene it was warmed to the boiling point until the solid was dissolved. The vial was sealed with a cap and allowed to cool down to room temperature. After a few minutes (2 to 5 min.) the tube was inverted. The sample was defined as a gel, if no flow was observed.

### General Procedure for the synthesis of bile acid hydrazides:

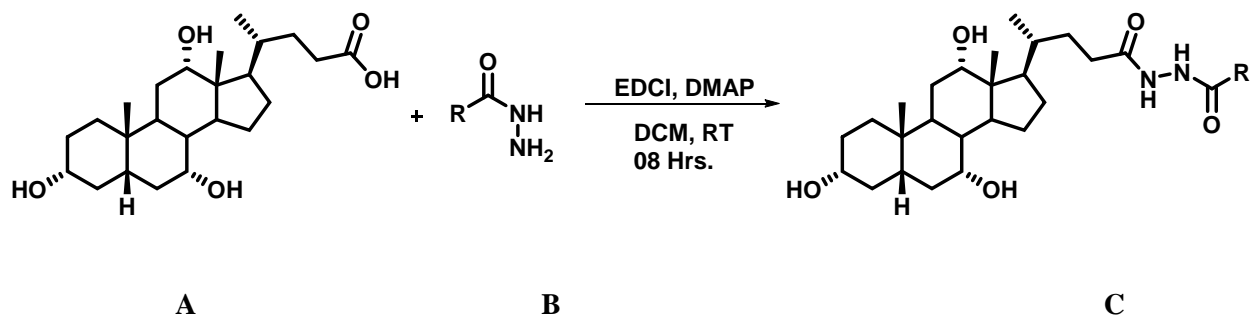

To a solution of cholic acid (**A**) (1 mmol), acid hydrazide (**B**) (1 mmol), and EDCI (1.2 mmol) dissolved in DCM (10 mL), DMAP (1.2 mmol) was added in one portion at room temperature. The reaction mixture was stirred at room temperature. After completion of the reaction, reaction mixture was extracted with 10% methanol in DCM. The organic layer was washed with saturated aqueous  $\text{NaHCO}_3$ , brine and was dried over  $\text{Na}_2\text{SO}_4$ . The crude product (**C**) on purification by column chromatography on silica gel yielded pure product.

**SCHEME**

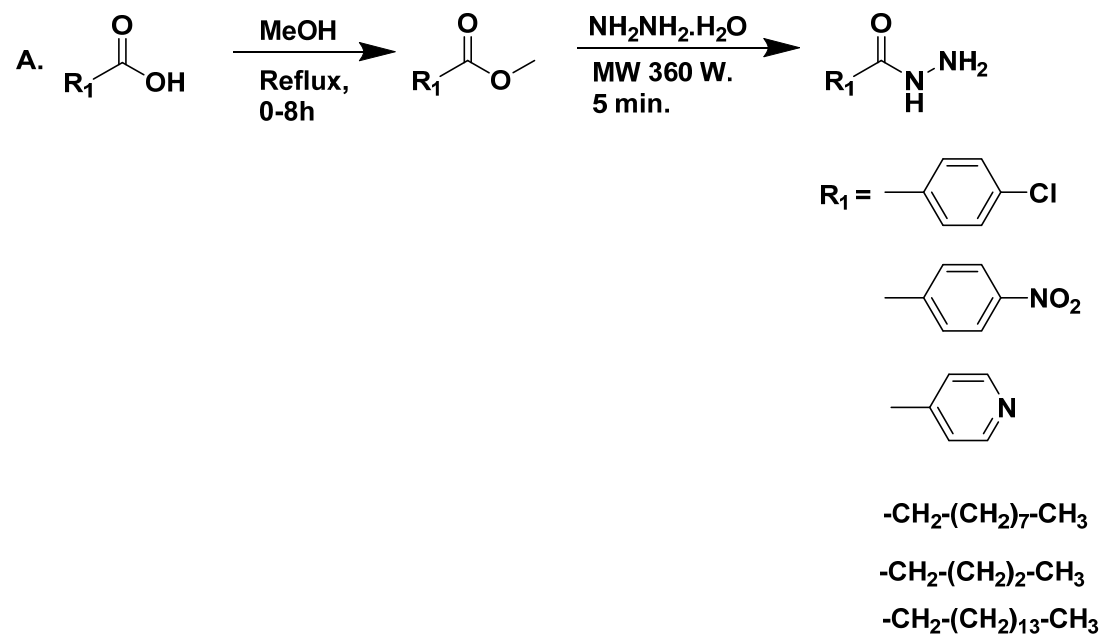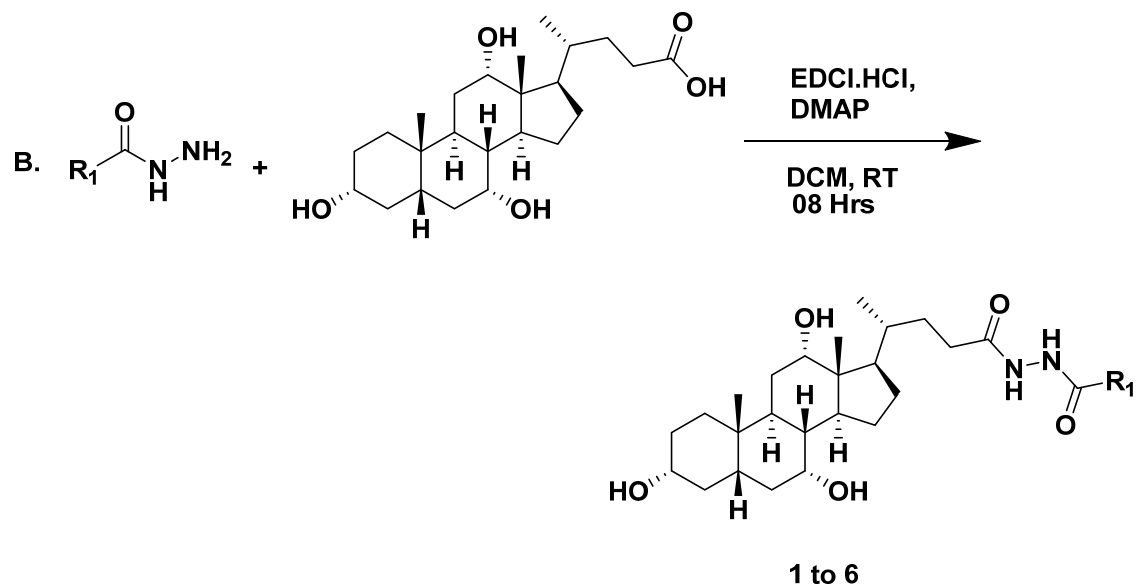

## E-SEM images

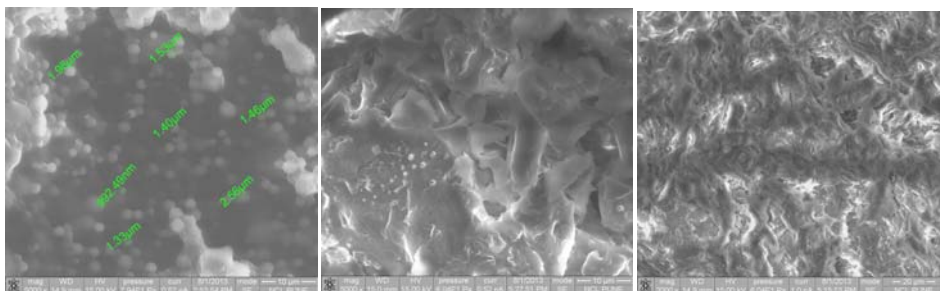

Benzene Gel

Benzene Gel after Sonication

Benzene Xerogel

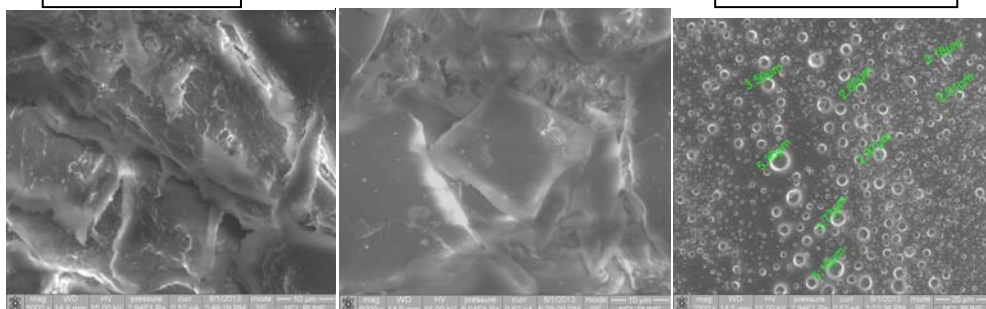

Chloroform Gel

Chloroform Gel after Sonication

Chloroform Xerogel

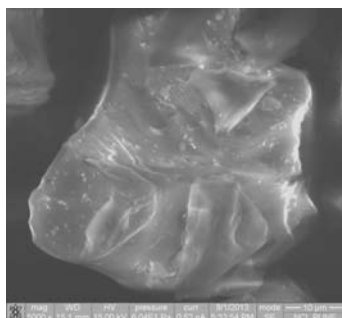

Sample after drying

E-SEM images of gels of 2% (w/v) compound **1** (Scale bars 10 μm)

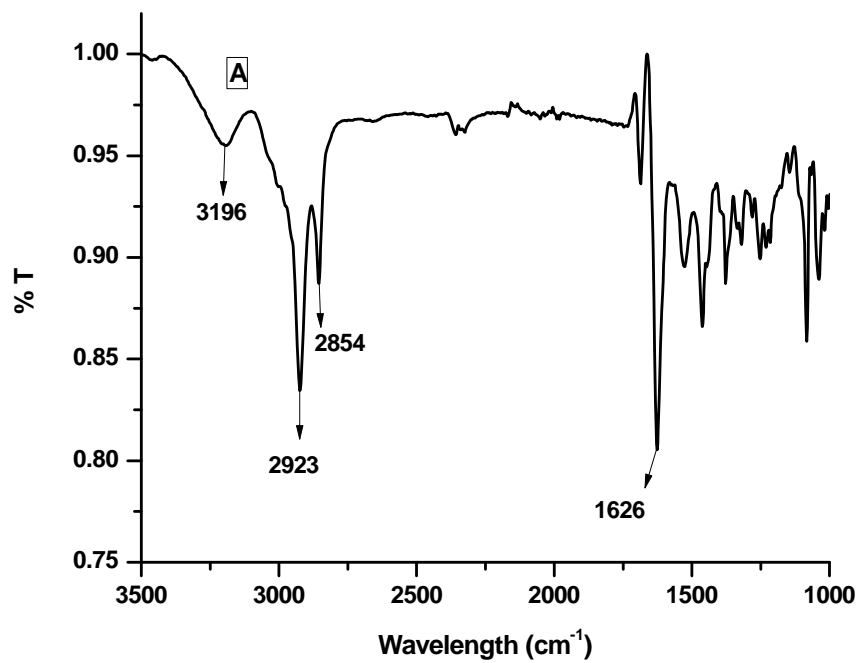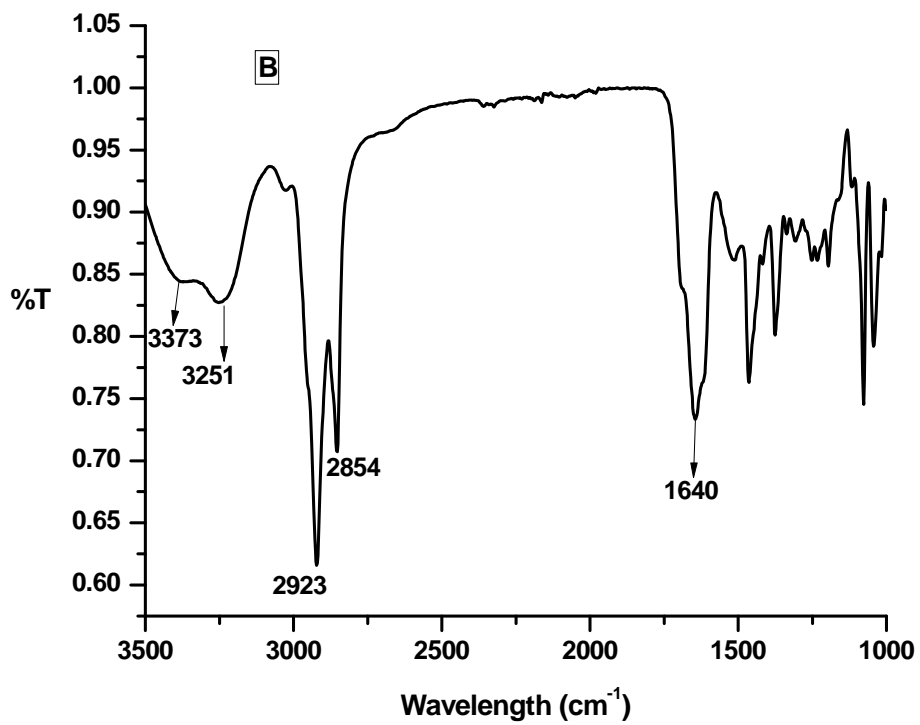

IR Spectra of (A) Chloroform Solution of 1 and (B) Chloroform gel of 1

## Differential Scanning Calorimetry (DSC)

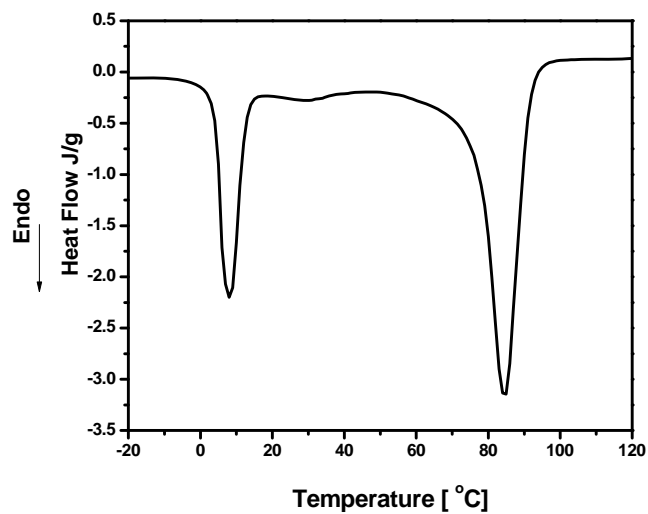

Benzene gel of compound 1

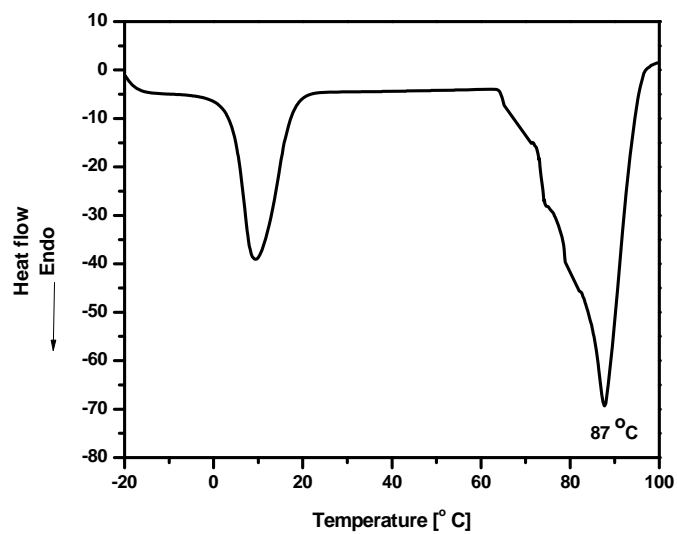

Benzene gel of compound 3

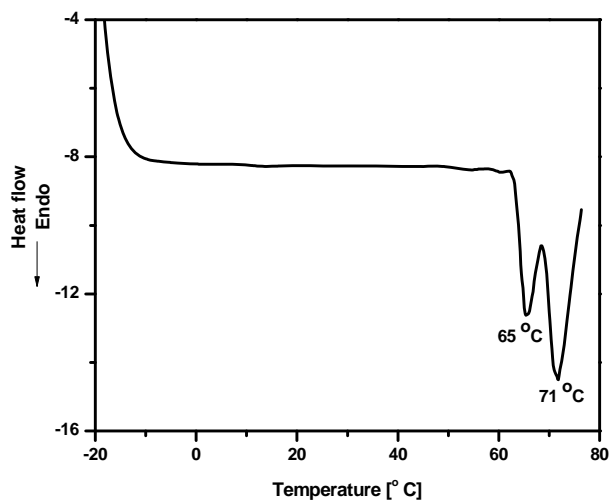

Chloroform gel of compound 1

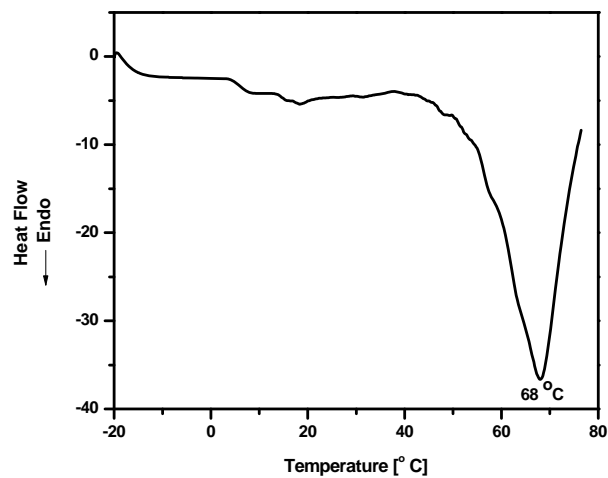

Chloroform gel of compound 3

### X-ray Diffraction:

Compound **1**, 2% w/v gels are prepared in chloroform. All the solvent from gel was evaporated under vacuum. The xerogel of the compound was obtained by scratching the compound from round bottom flask and analyzed for structure using X-ray diffraction. The X-ray diffraction study of xerogel was performed on Rigaku X-ray diffraction machine with MicroMax 007 HF generator and R-Axis IV++ detector. X-ray with Cu  $k_{\alpha}$  radiation source used for the experiment. X-ray diffraction machine was operated at 40kV and 30mA. The wavelength of X-ray is 0.154nm. Xerogel sample of compound **1** was scanned from  $2^{\circ}$  to  $60^{\circ}$ . X-ray diffraction spectrum shows two broad diffraction peaks from  $10^{\circ}$  to  $30^{\circ}$  and  $35^{\circ}$  to  $50^{\circ}$  suggest high amorphous content of xerogel.

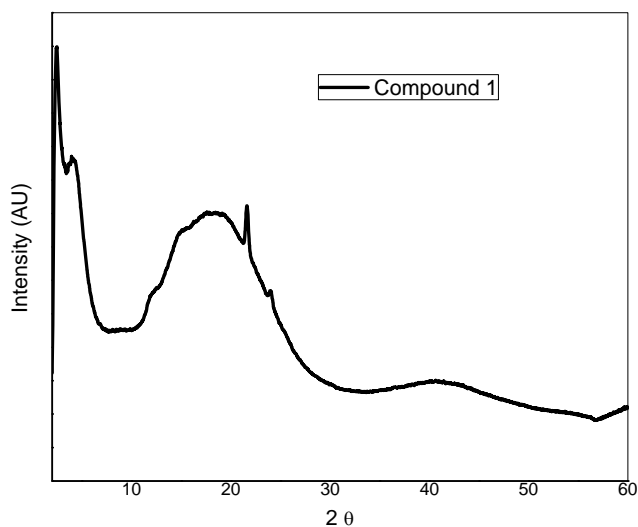



# <sup>1</sup>H NMR: Compound 1

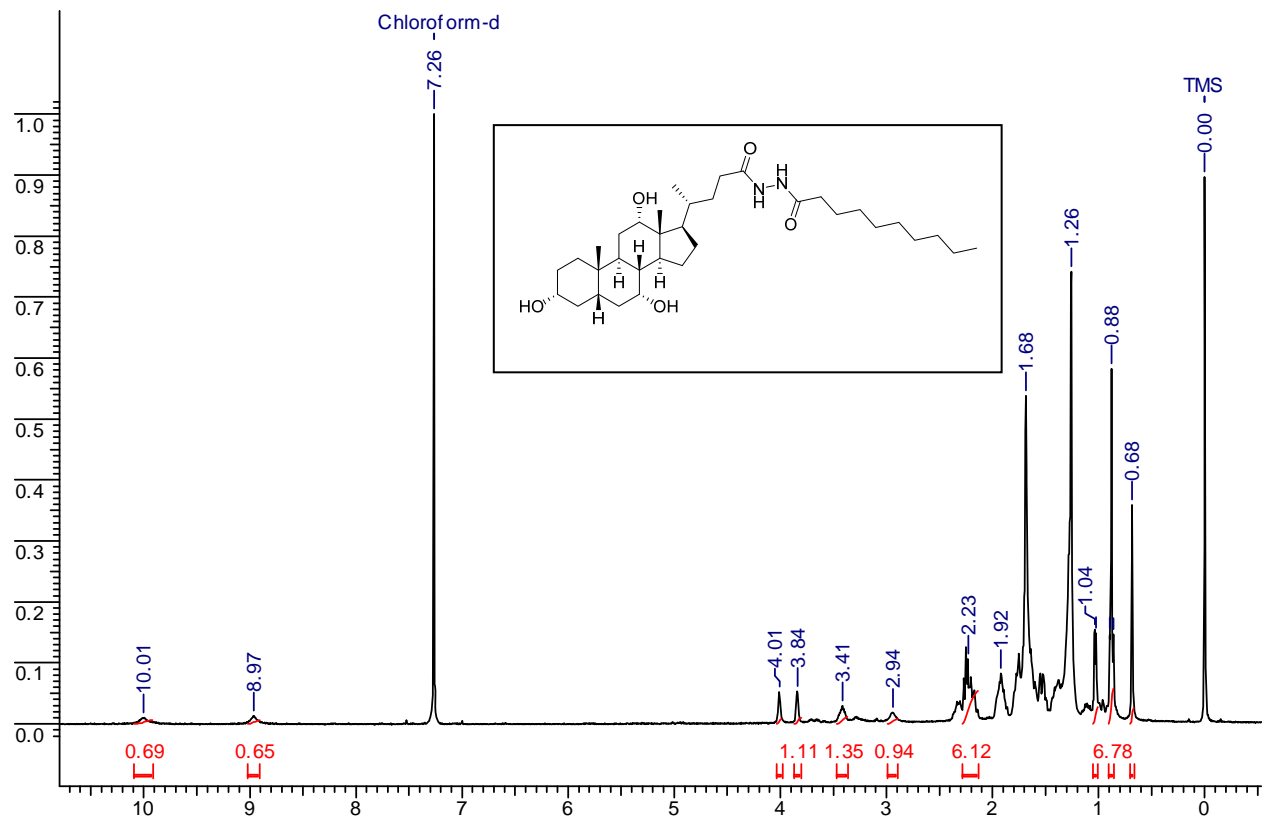

Proton-nitrogen ( $^1\text{H}$ - $^{15}\text{N}$ ) correlation spectrum of compound 1

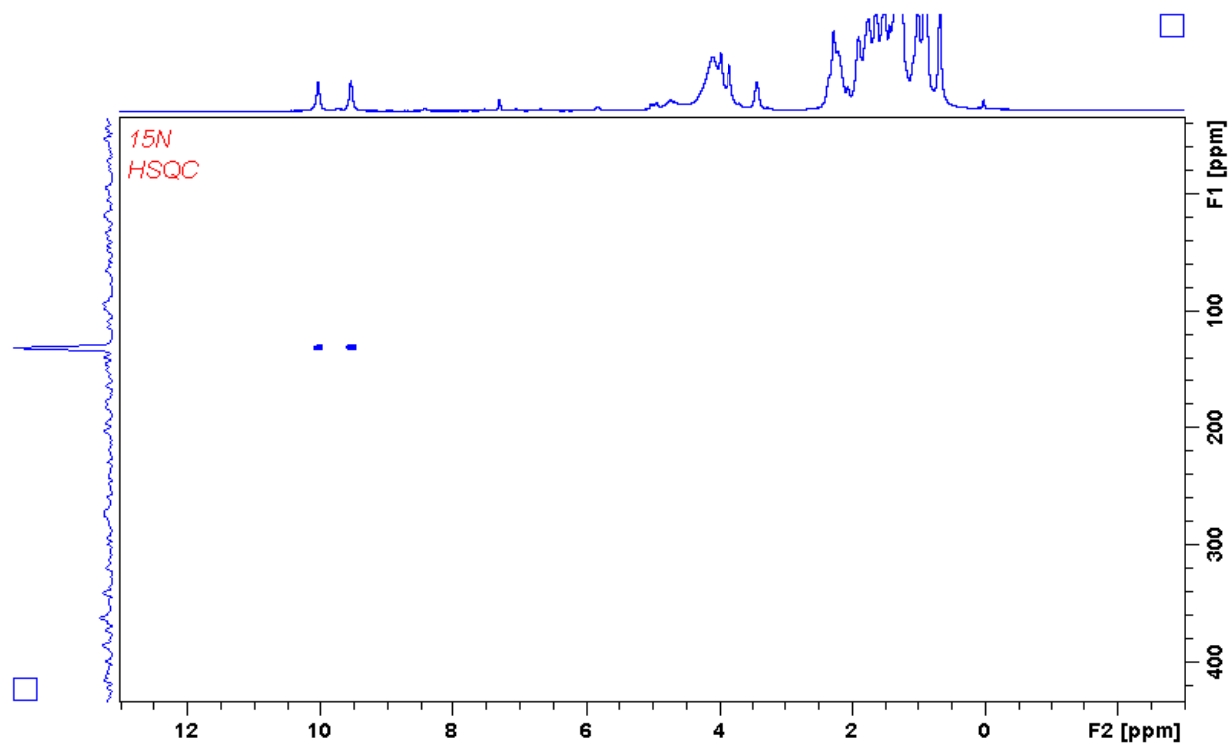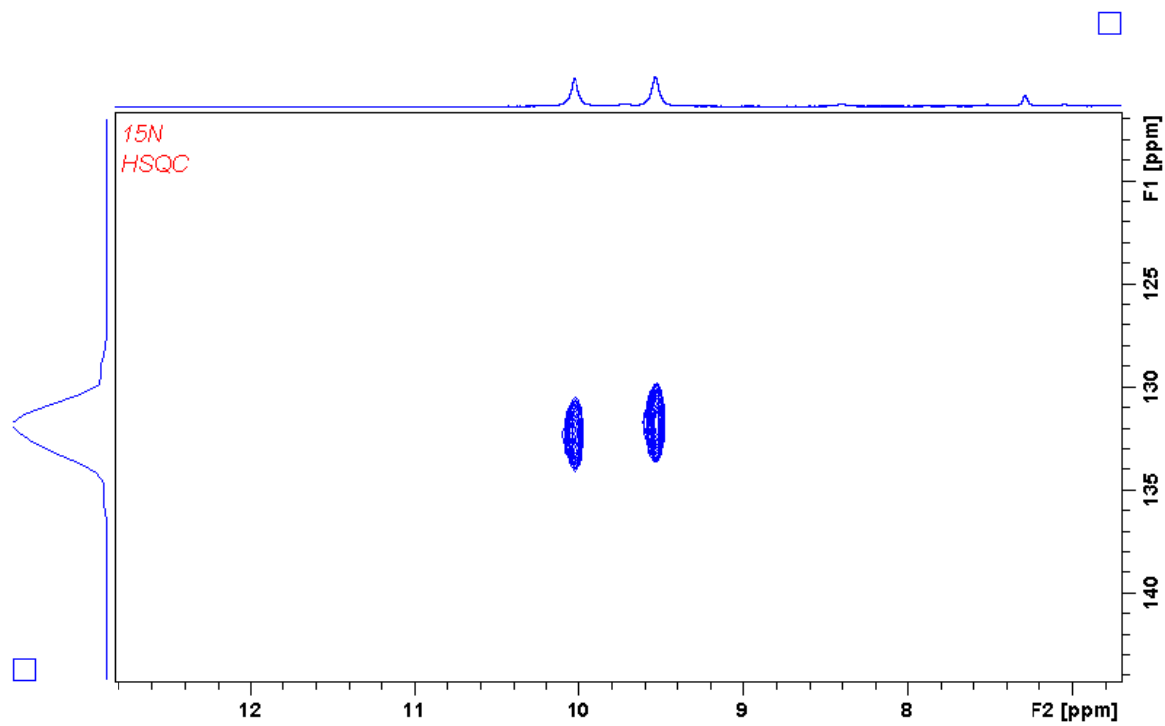

# Compound 2

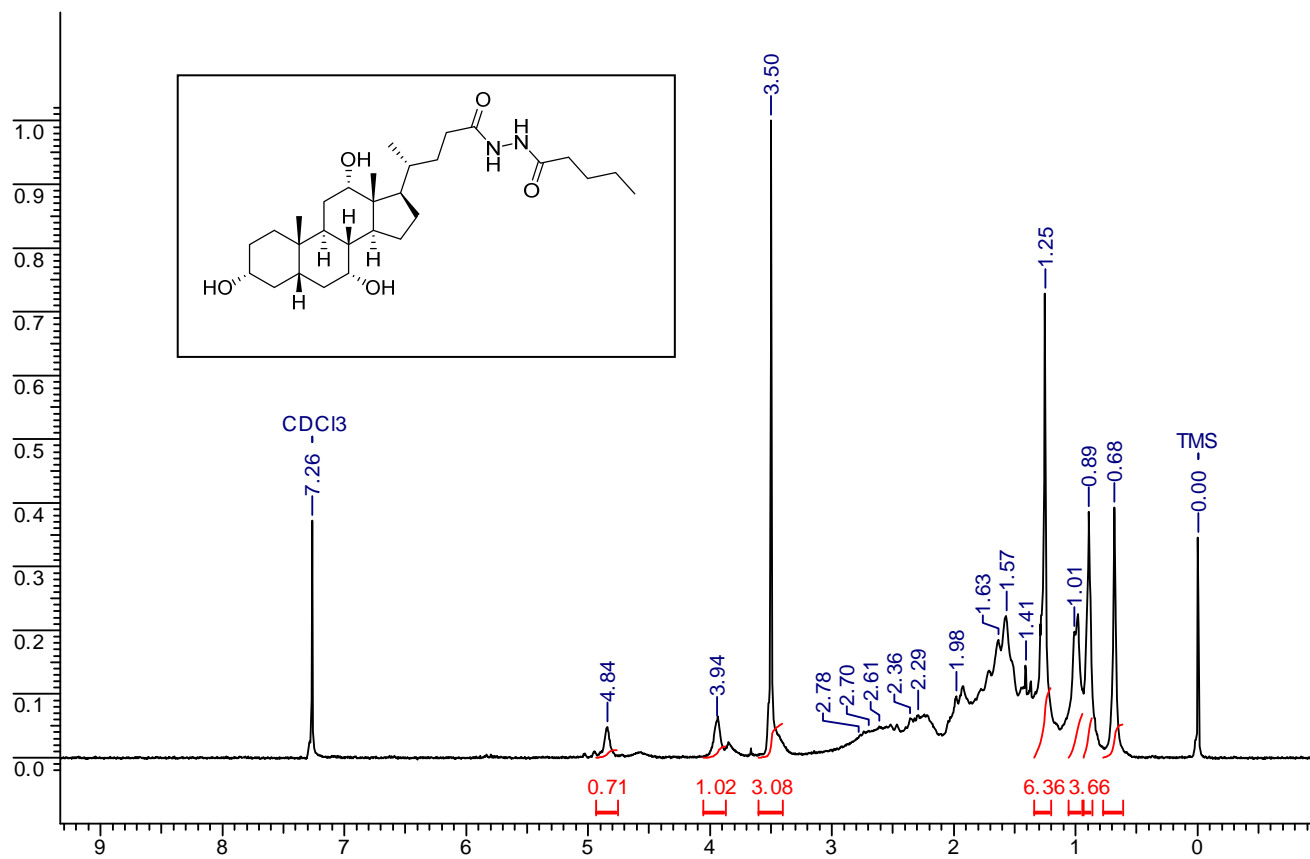

### Compound 3

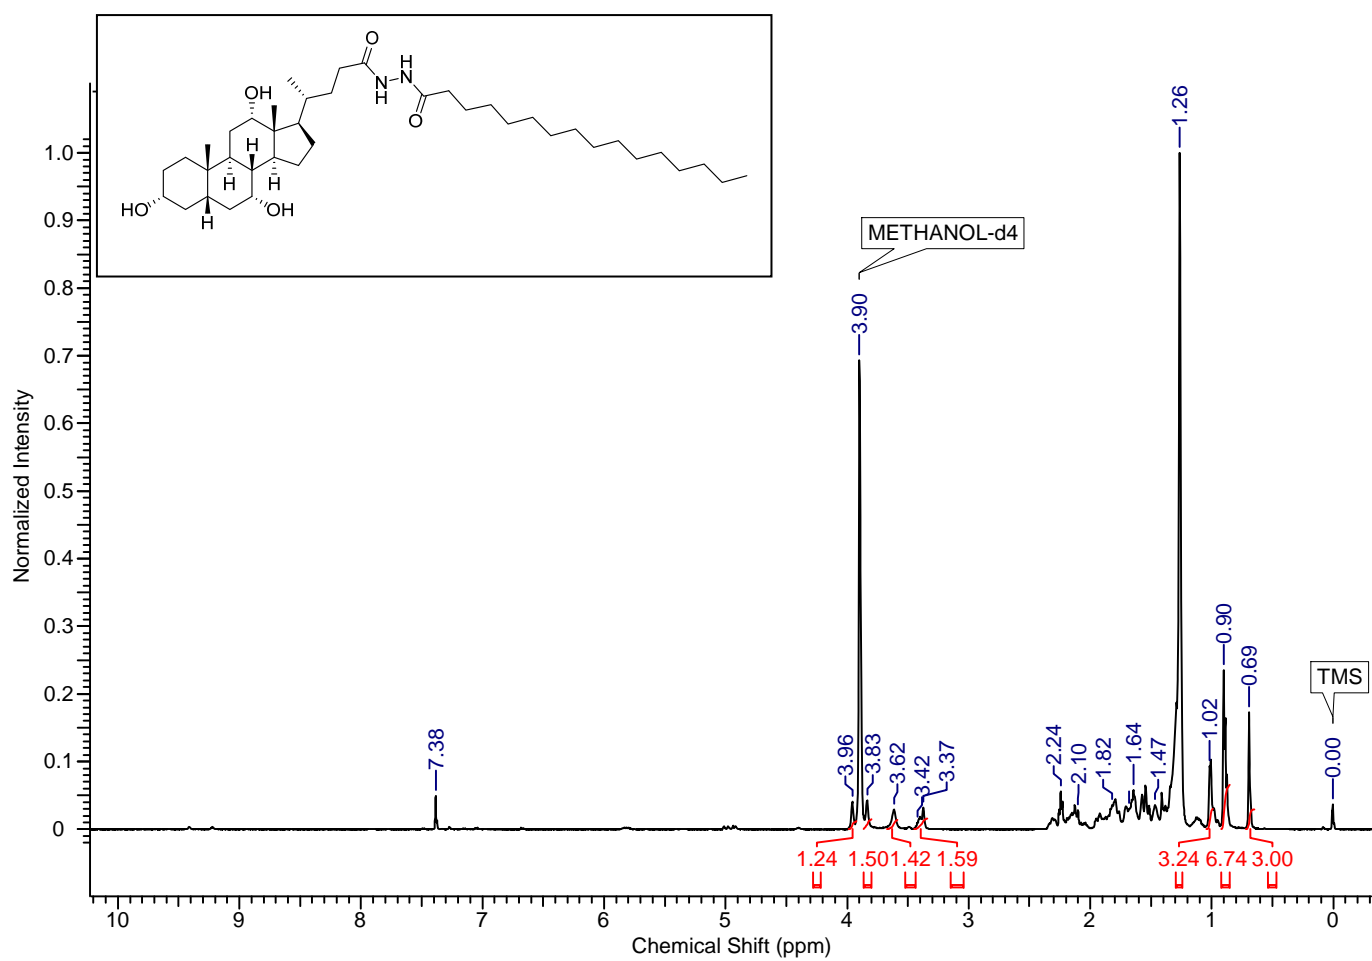

# Compound 4

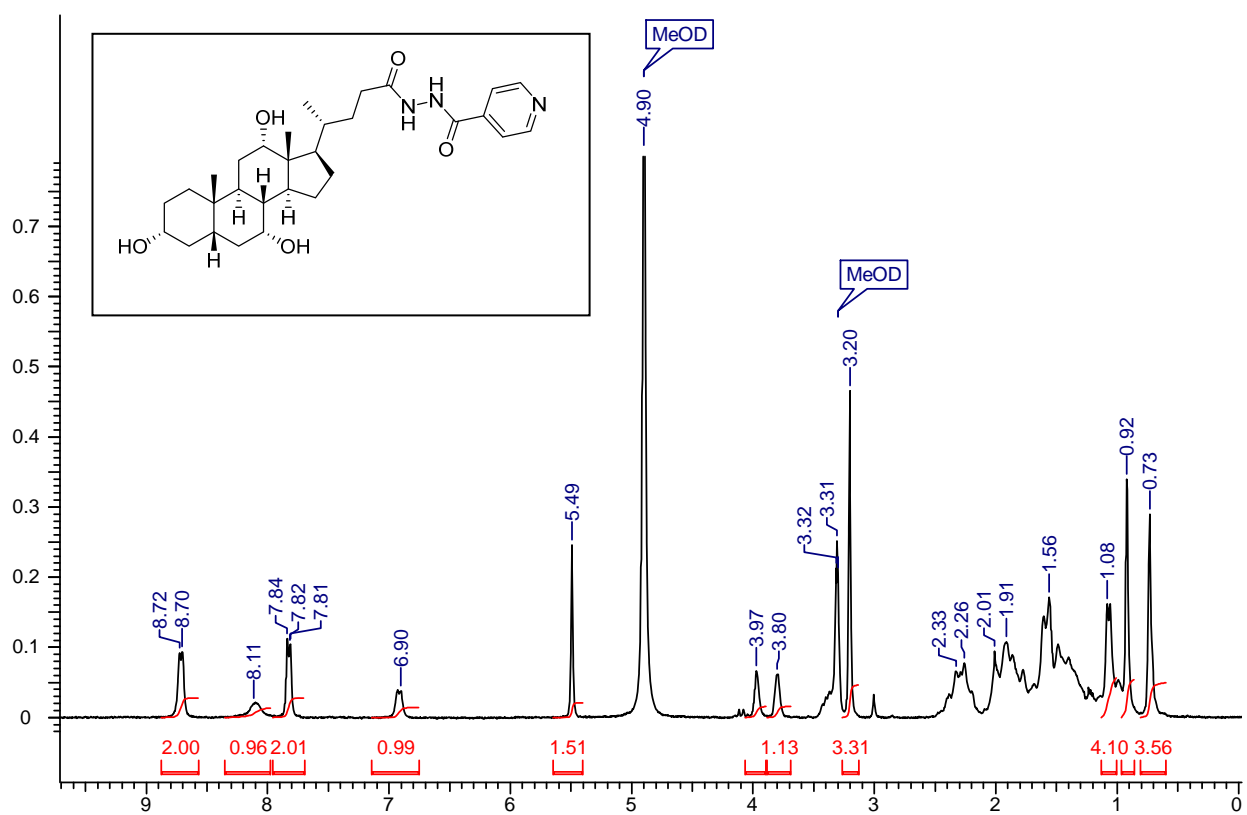

# Compound 5

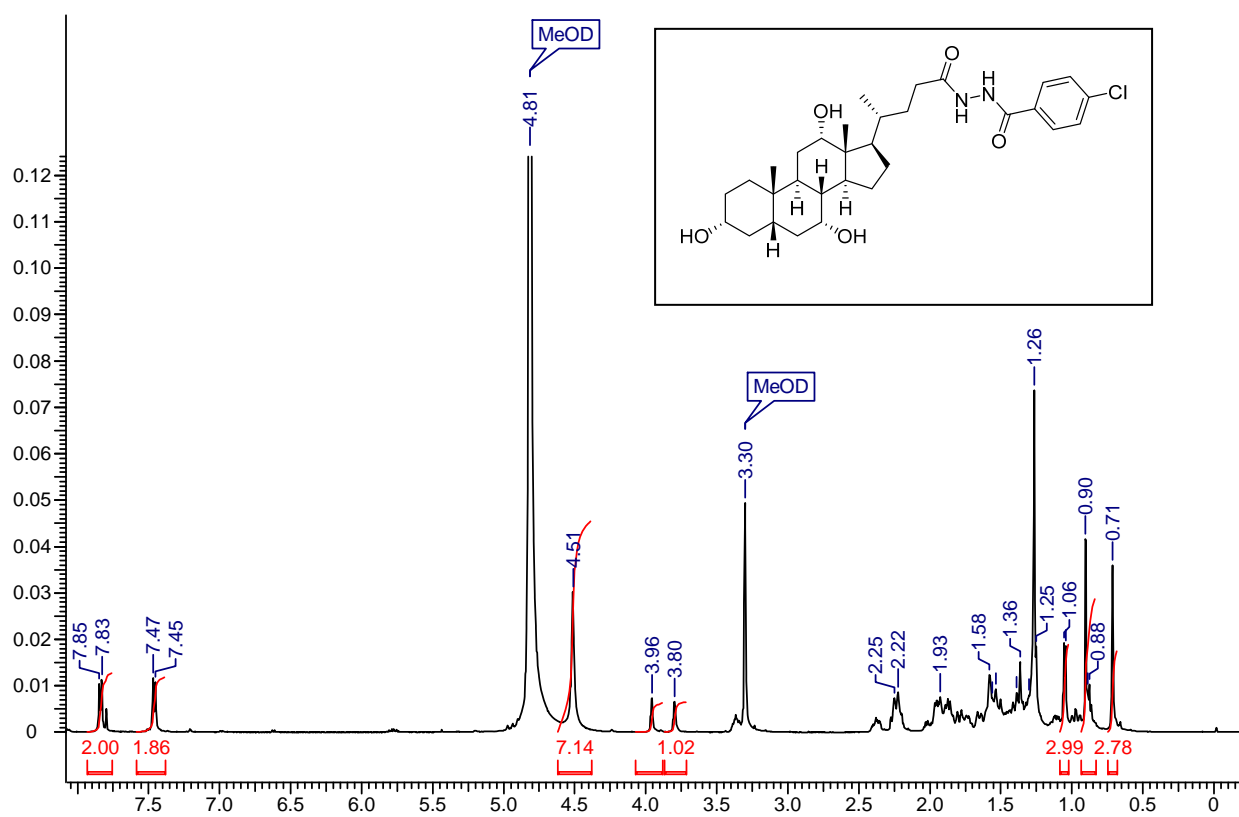

# Compound 6

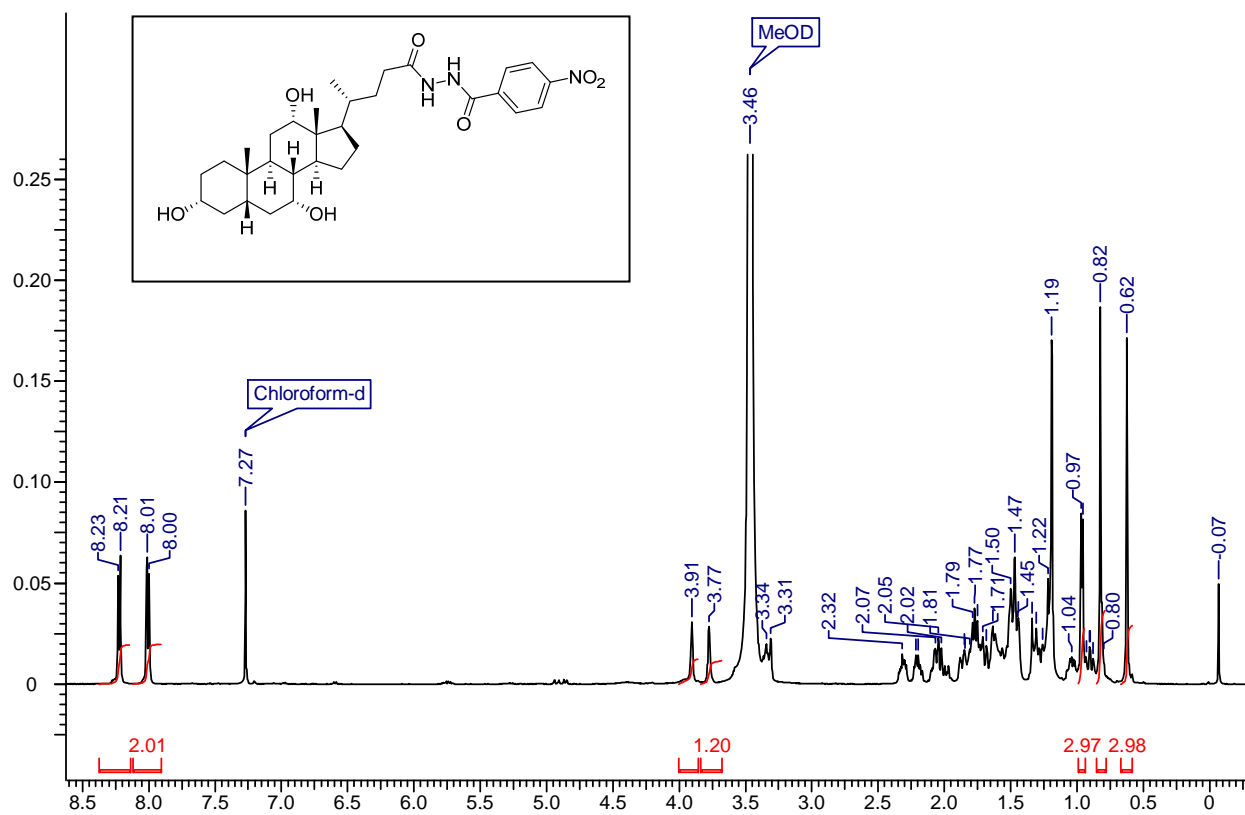

# HRMS: Compound 1

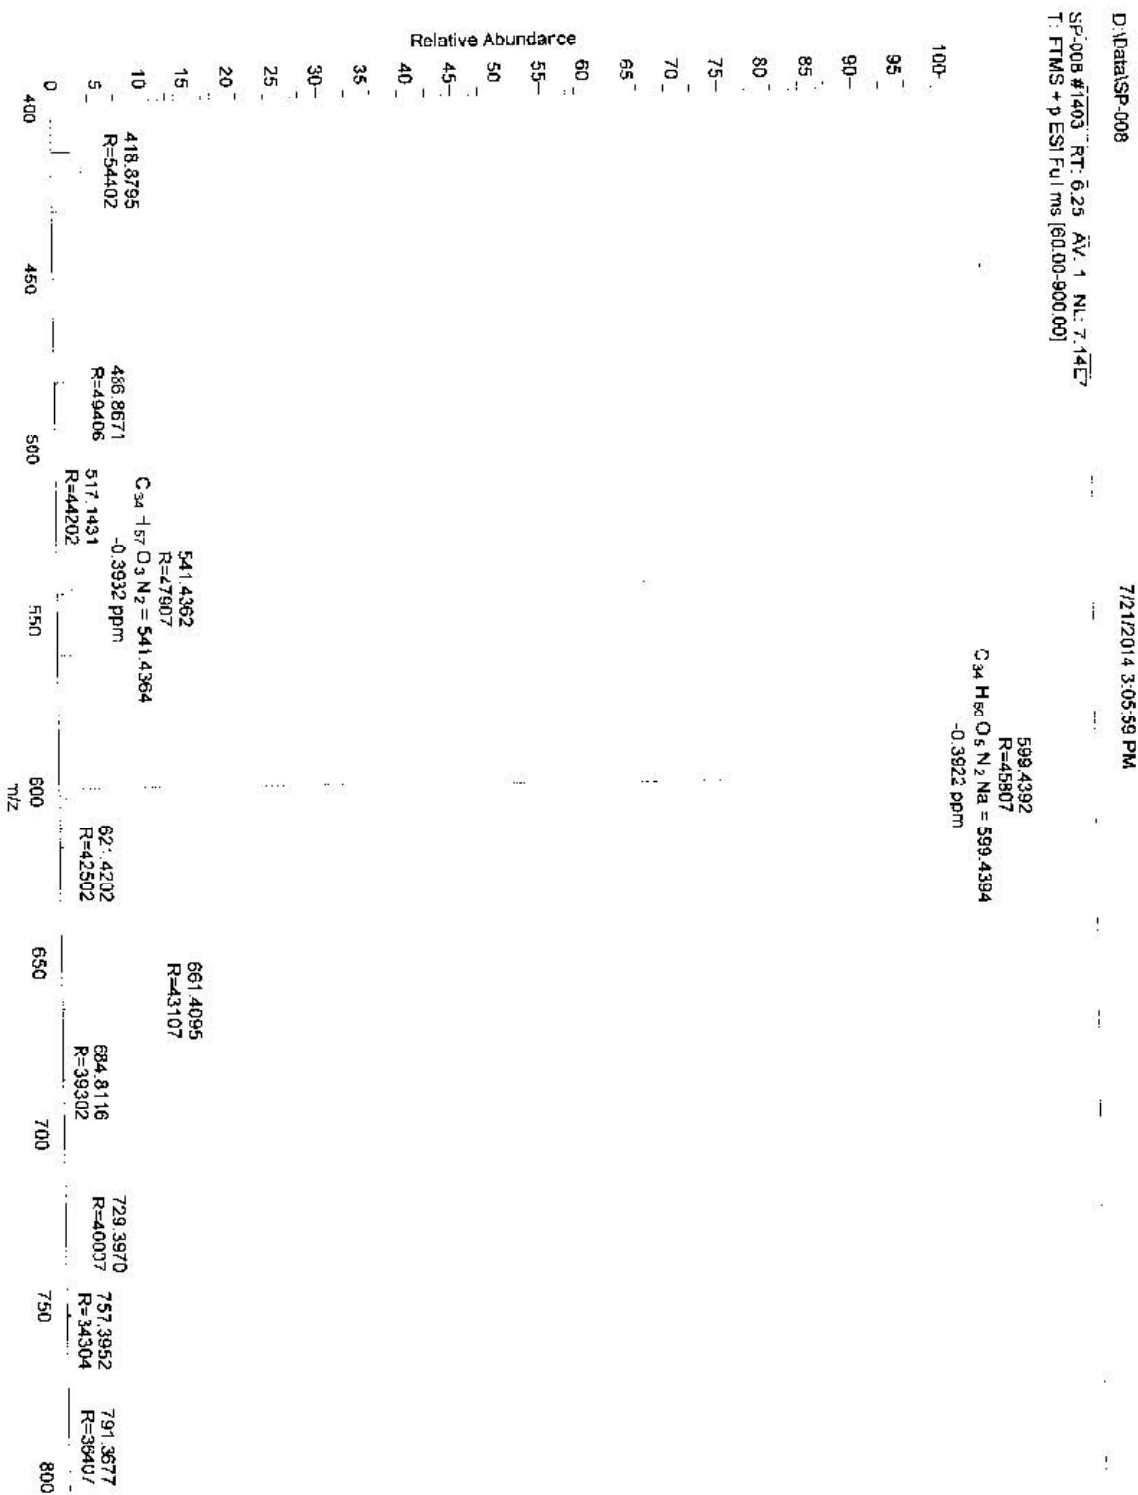



# Compound 3

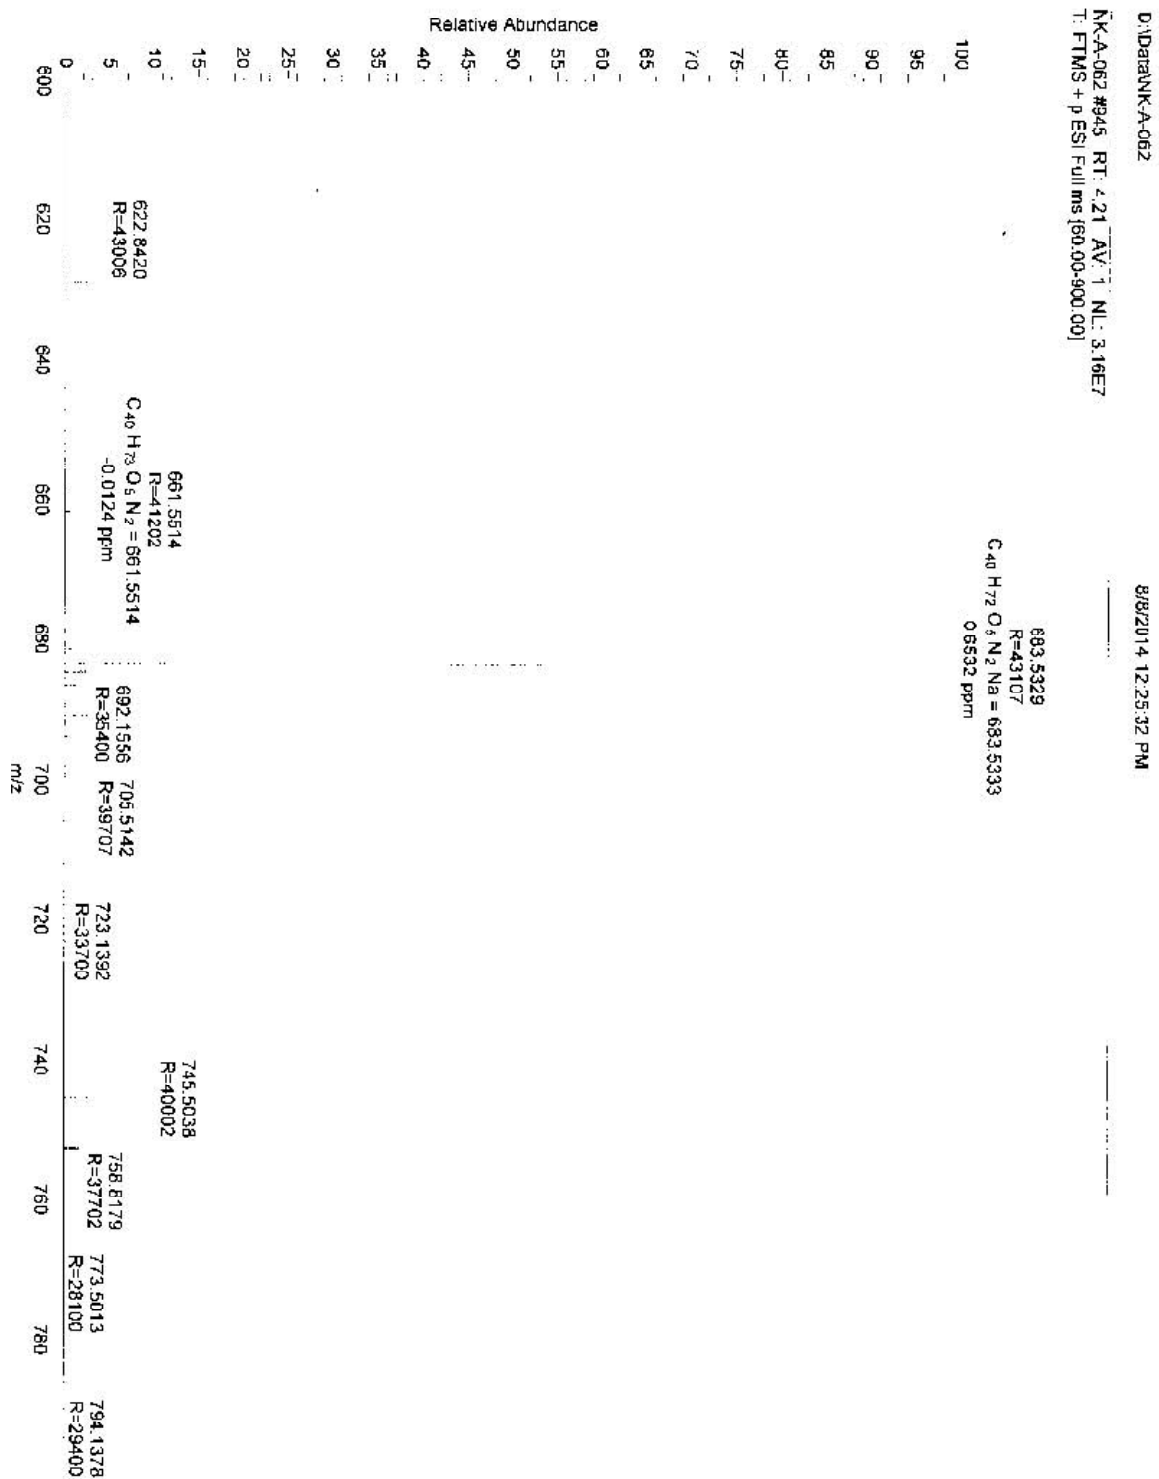

# Compound 4

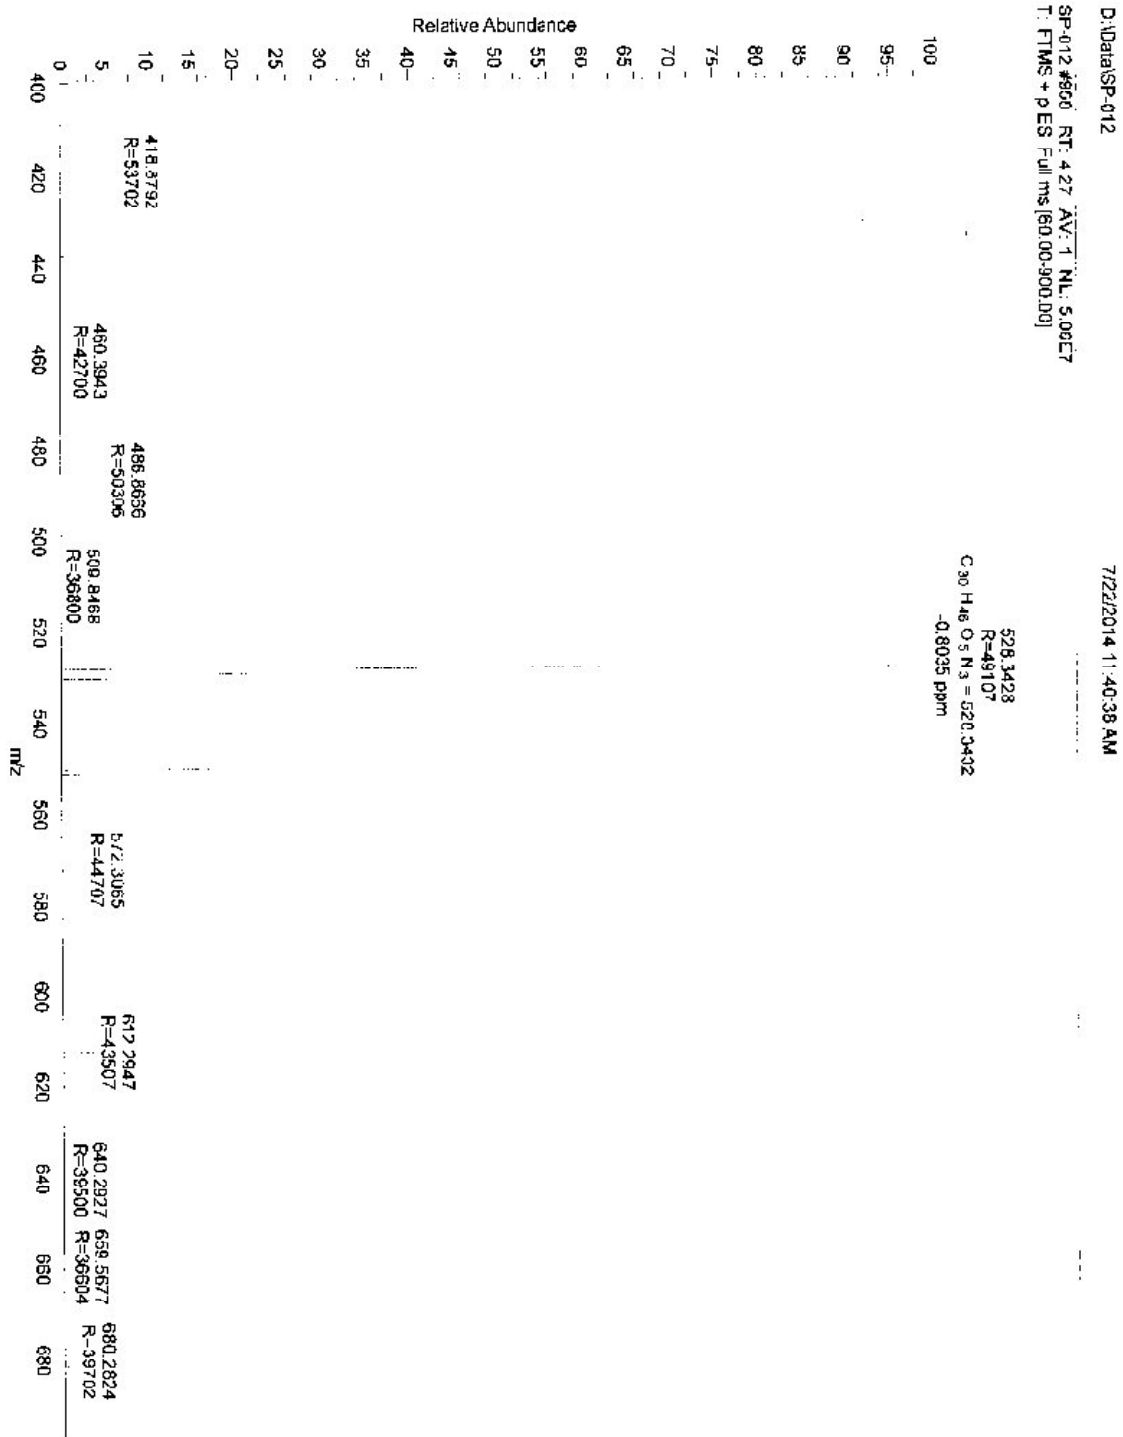

# Compound 5

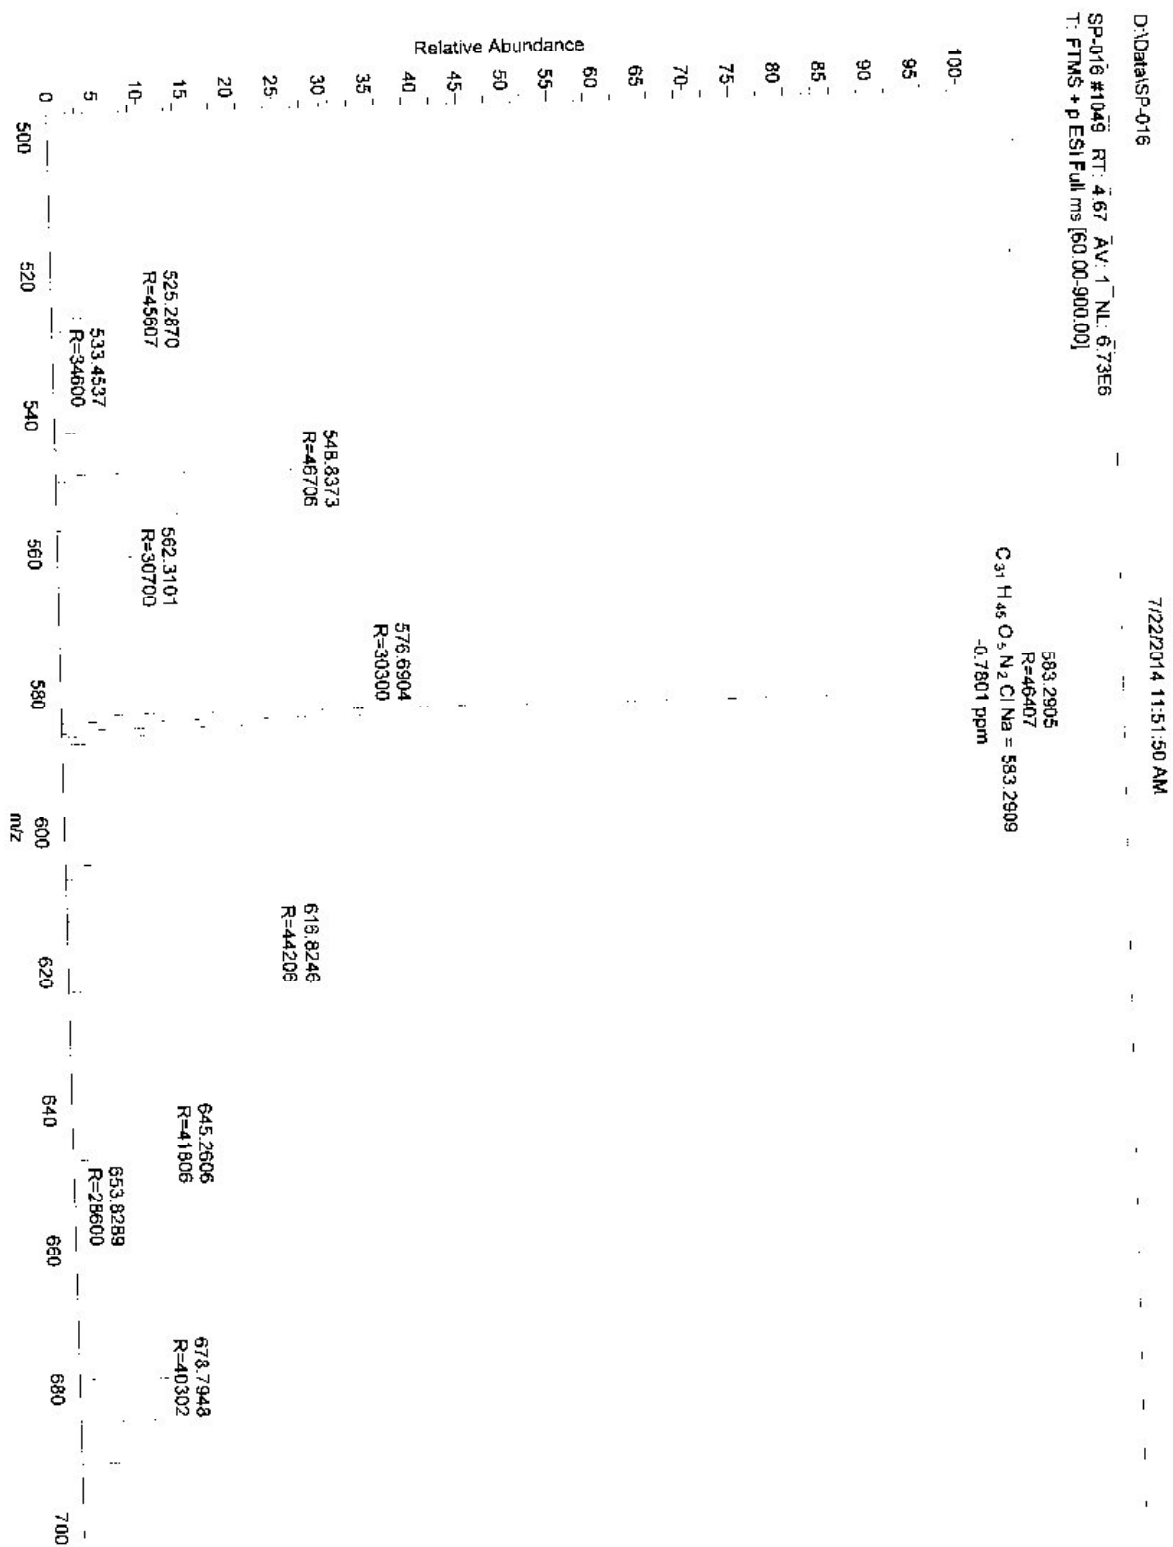

D:\Data\SP-022

1/22/2014 12:03:00 PM

SP-022 #994 RT: 4.43 AV: 1 NL: 2.17E7  
T: FTMS + p ESI Full ms (60.00-900.00)

594.3146  
R=46507  
C<sub>31</sub>H<sub>46</sub>O<sub>7</sub>N<sub>3</sub>Na = 594.3150  
-0.6674 ppm

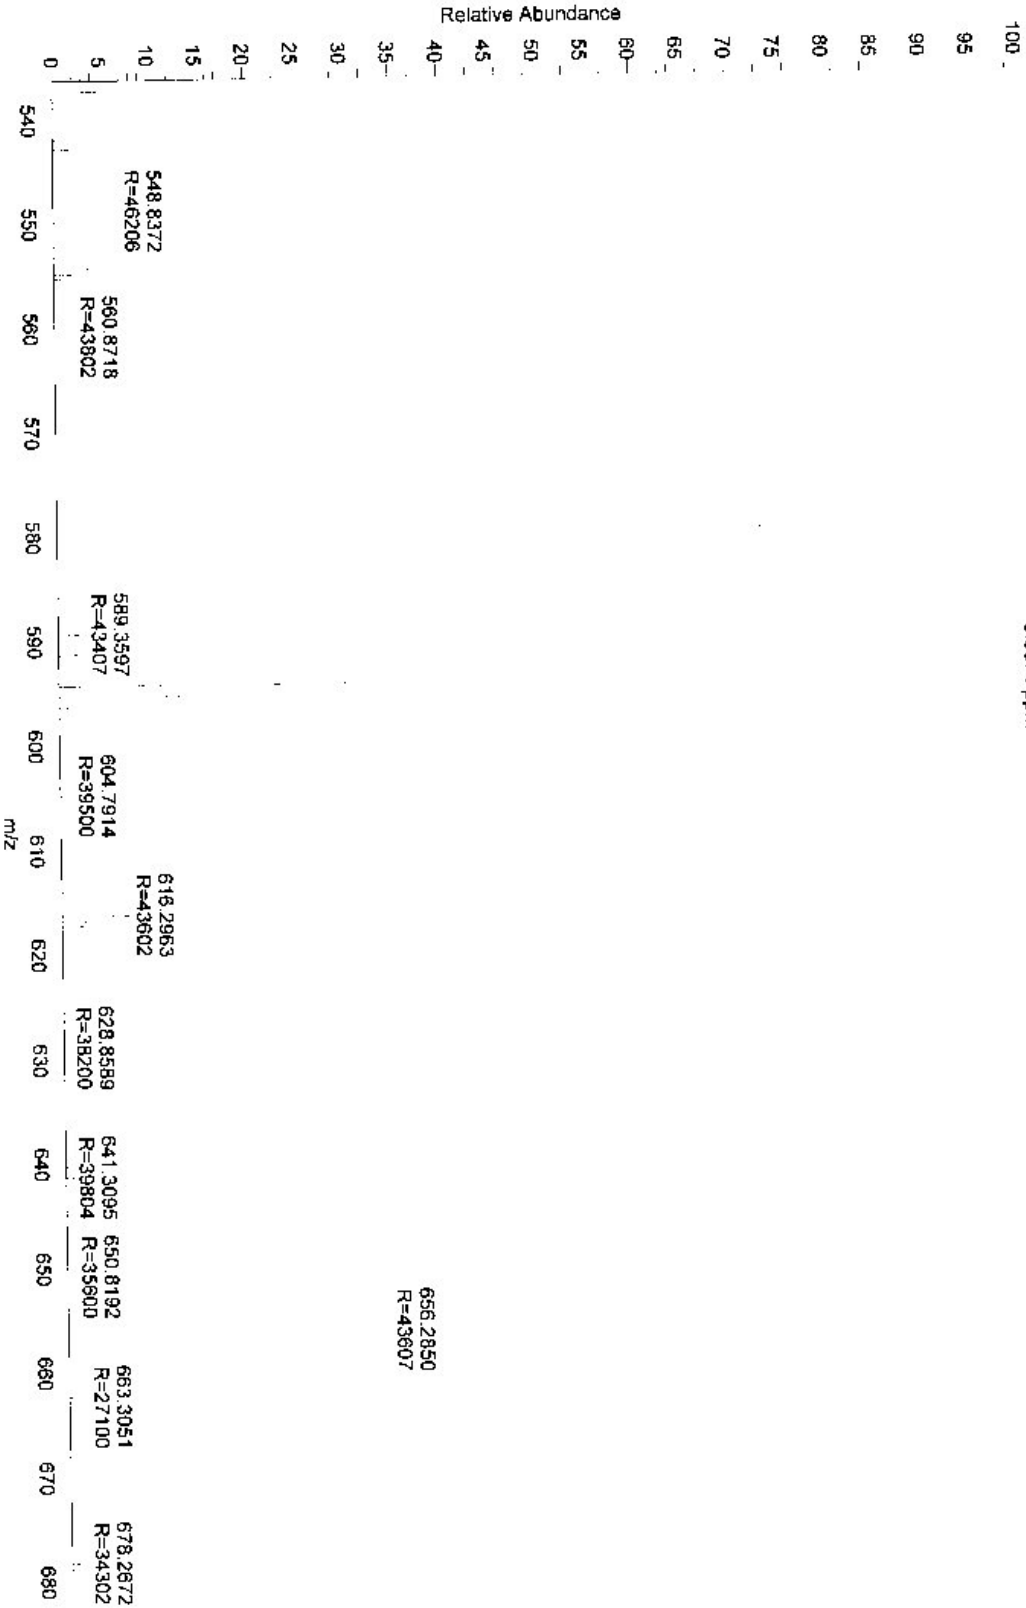

Compound 6
